# Supplementary material for: An electrochemical impedimetric platform formed by a CNT@UiO-66 nanocomposite for quantitative analysis of oxytetracycline
Source: Royal Society of Chemistry journal article supplement (doi:10.1039/d3dt01980b), 2023-01-01
Supplement: d3dt01980b1.pdf [file d3dt01980b1.pdf]

## Electronic Supplementary

### An electrochemical impedimetric platform formed by a CNT@UiO-66 nanocomposite for quantitative analysis of oxytetracycline

Rongrong Yuan,<sup>[a]\*</sup> Hongxu Chen,<sup>[b]\*</sup> Jiawei Liu,<sup>[a]</sup> Ruyu Li,<sup>[a]</sup> and Hongming He<sup>[c]\*</sup>

<sup>a</sup> *Department of Materials Science and Engineering, Jilin Jianzhu University, Changchun 130118, P. R. China.*

<sup>b</sup> *Nanotechnology Research Institute (NRI), Jiaxing University, Jiaxing, 314001, P. R. China*

<sup>c</sup> *Tianjin Key Laboratory of Structure and Performance for Functional Molecules, College of Chemistry, Tianjin Normal University, Tianjin 300387, P. R. China.*

*E-mail: yuanrongrong@jlju.edu.cn (R. Yuan); hx.chen@zjxu.edu.cn (H. Chen); hehongminghz@163.com (H. He).*

## **1. Materials and methods**

Reagents and Chemicals used in this work were obtained from commercial companies. The aptamer was purchased from Shanghai Sangon Biotechnology Co., Ltd. with 5'-GGA ATT CGC TAG CAC GTT GAC GCT GGT GCC CGG TTG TGG TGC GAG TGT TGT GTG GAT CCG AGC TCC ACG TG-3'. Bruker ALPHA-T FT-IR spectrometer was used to collect Fourier transform infrared (FT-IR) spectra (FT-IR instrument, Bruker, Bruker ALPHA-T, Germany). Rigaku SmartLab was performed to acquire powder X-ray diffraction (PXRD) data (PXRD instrument, Rigaku, Rigaku SmartLab, Japan). Transmission electron microscope (TEM) images were measured using Tecnai G<sup>2</sup> F20 S-TWIN (TEM instrument, FEI, Tecnai G<sup>2</sup> F20 S-TWIN, United States of America). N<sub>2</sub> isotherm was carried out on Micromeritics ASAP 2020 (N<sub>2</sub> isotherm instrument, Micromeritics, Micromeritics ASAP 2020, United States of America).

## **2. Electrochemical measurements**

Electrochemical impedance spectroscopy (EIS) data were collected on CHI440C workstation (Shanghai Chenhua). There are three electrodes in the electrochemical sensing system, including gold electrode as a working electrode, Ag/AgCl with saturated KCl as a reference electrode, and Pt slide as a counter electrode. KCl (100 mM) and [Fe(CN)<sub>6</sub>]<sup>3-/4-</sup> (0.5 mM) were mixed together as an electrolyte.

## **3. Different OTC concentrations in real samples**

The Songhua river was collected from Jilin Province, China. The sample was firstly filtered to obtain the pretreated water, which was further centrifugated at 10,000 rpm for 15 min to obtain the upper supernatant. Then it was treated by passing through a 0.2 μm membrane to

acquire the test sample. The final test samples were diluted 500 times by ultrapure water.

Different OTC amounts were used to obtain the test samples.

#### 4. Figures and Tables

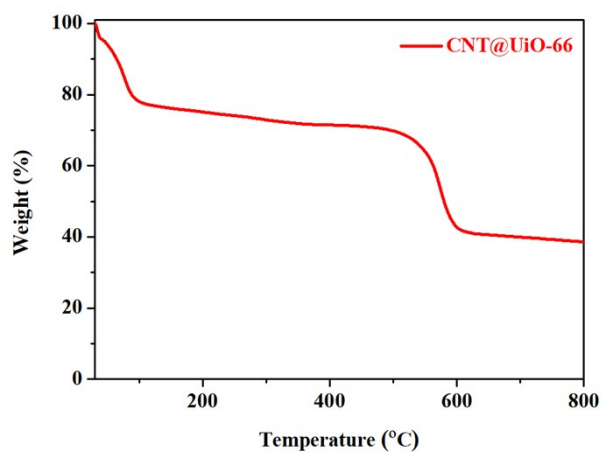

**Fig. S1.** The TGA curve of CNT@UiO-66.

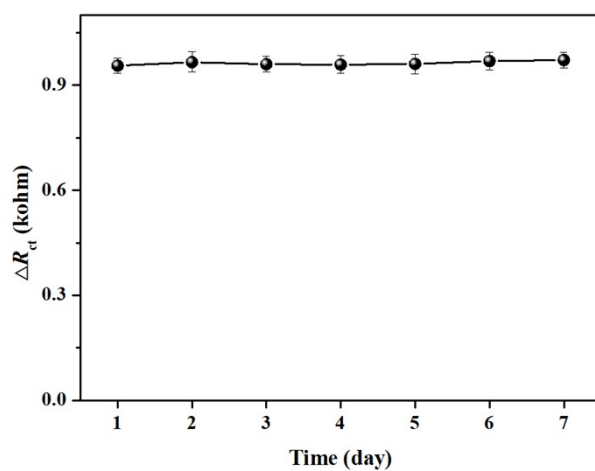

**Fig. S2.** The stability of the CNT@UiO-66-based electrochemical aptasensor for 7 days.

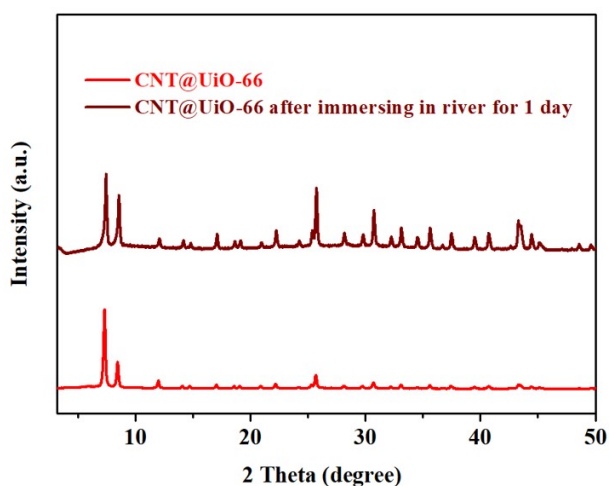

**Fig. S3.** The PXRD patterns of CNT@UiO-66 before and after immersing in river for 1 day.

**Table S1.** Detecting OTC using different materials and methods.

| Material                                                              | Detection method                  | LOD (nM) | Ref.      |
|-----------------------------------------------------------------------|-----------------------------------|----------|-----------|
| GO-adenosine hydrogel                                                 | Fluorescent assay                 | 54.3     | [1]       |
| CD@AMP/Eu NCPs                                                        | Fluorescence                      | 25       | [2]       |
| GQDs/CdTe@MIPs                                                        | Fluorescence                      | 3.5      | [3]       |
| DNA-functionalized Cu(HBTC)                                           | Fluorescence                      | 0.869    | [4]       |
| ITO/TiO <sub>2</sub> /H-DNA@QD                                        | Photoelectrochemical spectroscopy | 0.19     | [5]       |
| Au/BaTiO <sub>3</sub> /Cu <sub>3</sub> Mo <sub>2</sub> O <sub>9</sub> | Photoelectrochemical              | 46 pM    | [6]       |
| Aptamer probe                                                         | Microchip electrophoresis         | 1.95 pM  | [7]       |
| AuNPs/cMWCNTs/cDNA@thionine                                           | Differential pulse voltammetry    | 67.30 fM | [8]       |
| Fe <sub>3</sub> O <sub>4</sub> @mesoporous carbon                     | EIS                               | 58.6 fM  | [9]       |
| Ce-MOF@MCA500                                                         | EIS                               | 37.79 fM | [10]      |
| Au@POF                                                                | EIS                               | 6.93 fM  | [11]      |
| CNT@UiO-66                                                            | EIS                               | 3.21 fM  | This work |

## 5. References

1. B. Tan, H. Zhao, L. Du, X. Gan and X. Quan, *Biosens. Bioelectron.*, 2016, **83**, 267–273.
2. L. Chen, H. Xu, L. Wang, Y. Li and X. Tian, *Microchim. Acta*, 2020, **187**, 125.
3. W. Wang, Y. Xu, X. Liu, L. Peng, T. Huang, Y. Yan and X. Li, *Microchem. J.*, 2020, **157**, 105053.
4. B. Tan, D. Wang, Z. Cai, X. Quan and H. Zhao, *Sensor. Actuat. B-Chem.*, 2020, **303**, 127230.
5. Y. Li, J. Tian, T. Yuan, P. Wang and J. Lu, *Sensor. Actuat. B-Chem.*, 2017, **240**, 785–792.
6. J. Lv, X. Chen, S. Chen, H. Li and H. Deng, *J. Electroanal. Chem.*, 2019, **842**, 161–167.
7. Y. Wang, N. Gan, Y. Zhou, T. Li, F. Hu, Y. Cao and Y. Chen, *Biosens. Bioelectron.*, 2017, **97**, 100–106.
8. B. He, L. Wang, X. Dong, X. Yan, M. Li, S. Yan and D. Yan, *Food Chem.*, 2019, **300**, 125179.
9. Y. Song, F. Duan, S. Zhang, J.-Y. Tian, Z. Zhang, Z.-W. Wang, C.-S. Liu, W.-M. Xu and M. Du, *J. Mater. Chem. A*, 2017, **5**, 19378–19389.
10. N. Zhou, Y. Ma, B. Hu, L. He, S. Wang, Z. Zhang and S. Lu, *Biosens. Bioelectron.*, 2019, **127**, 92–100.
11. Z.-Y. Han, Q.-Q. Zhu, H.-W. Zhang, R. Yuan and H. He, *J. Mater. Chem. C*, 2020, **8**, 14075–14082.
